# Supplementary material for: A high performance piezoelectric–triboelectric hybrid energy harvester by synergistic design
Source: Royal Society of Chemistry journal article supplement (doi:10.1039/d2ya00143h), 2022-01-01
Supplement: d2ya00143h1.pdf [file d2ya00143h1.pdf]

## **High performance piezoelectric-triboelectric hybrid energy harvester by synergistic design**

Dipak Kumar Khatua<sup>1,2\*</sup>, and Sang-Jae Kim<sup>1,3</sup>

*<sup>1</sup>Nanomaterials and System Lab, Department of Mechatronics Engineering, Jeju National University, Jeju 632-43, South Korea*

*<sup>2</sup>Department of Materials Engineering, Indian Institute of Science, Bangalore- 560013, India*

*<sup>3</sup>Research Institute of Energy New Industry, Jeju National University, Jeju 632-43, South Korea*

\*Corresponding author

Email Id: [dipakkh19@gmail.com](mailto:dipakkh19@gmail.com)

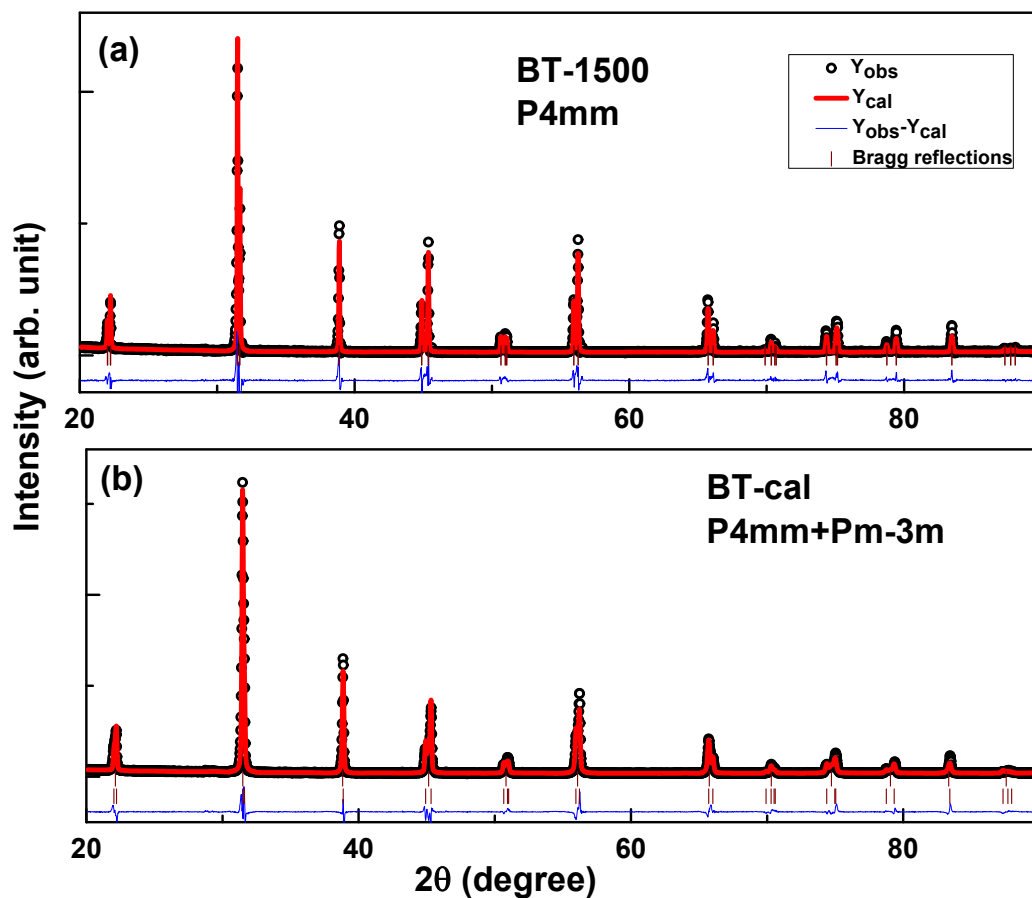

**Figure S1:** Rietveld refinement of the X-Ray powder diffraction (XRPD) patterns of different  $BaTiO_3$  specimens – (a) BT-1500 with P4mm space group and (b) BT-cal with P4mm + Pm-3m phase coexistence model. In the figure  $Y_{obs}$  implies data points,  $Y_{cal}$  signifies calculated pattern using respective space group model and  $Y_{obs} - Y_{cal}$  indicates difference plot among observed and calculated patterns.

**Table. S1:** Refined structural parameters of X-Ray powder diffraction data of BT-1500. Numerical values inside brackets of all the parameters indicate error in the refined value.

| <b>Tetragonal (P4mm) structural parameters of BT-1500</b>                                                      |     |     |          |                                                 |
|----------------------------------------------------------------------------------------------------------------|-----|-----|----------|-------------------------------------------------|
| Atomic Coordinates                                                                                             | x   | y   | z        | Isotropic Thermal Parameters ( $\text{\AA}^2$ ) |
| Ba                                                                                                             | 0   | 0   | 0        | 0.02(0)                                         |
| Ti                                                                                                             | 0.5 | 0.5 | 0.476(3) | 0.03(0)                                         |
| O1                                                                                                             | 0.5 | 0.5 | 0.012(0) | 1.0(0)                                          |
| O2                                                                                                             | 0.5 | 0   | 0.520(0) | 1.0(0)                                          |
| a =b= 3.9947(1) $\text{\AA}$ ; c = 4.0348(5) $\text{\AA}$ ; Rp = 9.03; Rwp =11.6; Rexp = 9.43; $\chi^2$ = 3.81 |     |     |          |                                                 |

**Table. S2:** Refined structural parameters of X-Ray powder diffraction data of BT-cal. Numerical values inside brackets of all the parameters indicate error in the refined value.

| <b>Tetragonal (P4mm) structural parameters of BT-cal</b>                                                                                  |     |     |          |                                                 |
|-------------------------------------------------------------------------------------------------------------------------------------------|-----|-----|----------|-------------------------------------------------|
| Atomic Coordinates                                                                                                                        | x   | y   | z        | Isotropic Thermal Parameters ( $\text{\AA}^2$ ) |
| Ba                                                                                                                                        | 0   | 0   | 0        | 0.125(0)                                        |
| Ti                                                                                                                                        | 0.5 | 0.5 | 0.526(9) | 0.125(0)                                        |
| O1                                                                                                                                        | 0.5 | 0.5 | 0.014(0) | 1.0(0)                                          |
| O2                                                                                                                                        | 0.5 | 0   | 0.590(0) | 1.0(0)                                          |
| a =b= 3.9992(1) $\text{\AA}$ ; c = 4.0329(5) $\text{\AA}$ ; Rp = 7.79; Rwp =11.7; Rexp = 5.33; $\chi^2$ = 4.82; Phase fraction %=55.22(5) |     |     |          |                                                 |
| <b>Cubic (Pm-3m) structural parameters of BT-cal</b>                                                                                      |     |     |          |                                                 |
| Atomic Coordinates                                                                                                                        | x   | y   | z        | Isotropic Thermal Parameters ( $\text{\AA}^2$ ) |
| Ba                                                                                                                                        | 0   | 0   | 0        | 0.36 (0)                                        |
| Ti                                                                                                                                        | 0.5 | 0.5 | 0.5      | 0.08(7)                                         |
| O                                                                                                                                         | 0.5 | 0.5 | 0        | 1.0(0)                                          |
| a =b=c= 4.0138(2) $\text{\AA}$ ; Phase fraction %=44.78(9)                                                                                |     |     |          |                                                 |

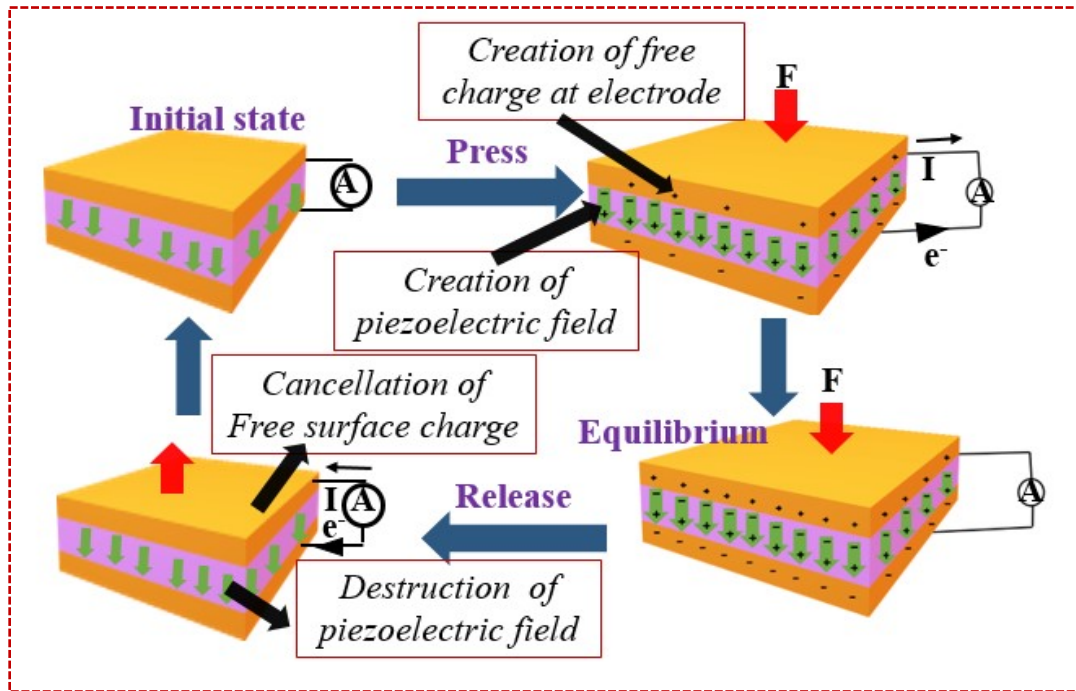

**Figure S2:** Mechanism of energy generation by mechanical impact on the PEH device shown schematically.

**Table. S3:** Comparison of electrical output performance of hybrid (TEH + PEH) mechanical energy harvesters from literatures. Emphasize is given to the nature of the composite in the hybrid device.

| Ref. no.  | Device structure                 | Active material/ Surface modification type                                                                        | Voltage | Current      |
|-----------|----------------------------------|-------------------------------------------------------------------------------------------------------------------|---------|--------------|
| 1         | PVDF hollow pipe with PDMS valve | Nanoporous PVDF hollow pipe                                                                                       | 105.5 V | 16.7 $\mu$ A |
| 2         | Rectangular                      | BaTiO <sub>3</sub> /PDMS/ plain surface                                                                           | 60 V    | 1 $\mu$ A    |
| 3         | Rectangular                      | PVDF/PANI composite with large pores inside                                                                       | 246V    | 122 $\mu$ A  |
| 4         | Cantilever resonator             | BaTiO <sub>3</sub> /PDMS/ microroughness (sandpaper template)                                                     | 14 V    | 4.5 $\mu$ A  |
| 5         | Spring type contact-separation   | Ti <sub>0.8</sub> O <sub>2</sub> nanosheets silver nanoparticles co-doped BaTiO <sub>3</sub> /PDMS/ plain surface | 150 V   | 0.03 $\mu$ A |
| 6         | C-shaped                         | PDMS/micropatterned PCB/NMF                                                                                       | 150 V   | 3.8 $\mu$ A  |
| 7         | Planar device-Electrospun        | Electrospun PVDF fibers                                                                                           | 210 V   | 45 $\mu$ A   |
| 8         | Planar device                    | Porous PVDF film                                                                                                  | 200 V   | 0.5 $\mu$ A  |
| 9         | Planar deice                     | ZnO/ Paper/ PMMA                                                                                                  | 38.4 V  | 1.3 $\mu$ A  |
| This work | Planner device                   | Grain size enhanced BaTiO <sub>3</sub> /PDMS                                                                      | 100 V   | 2 $\mu$ A    |

## References

1. Z. Yu, M. Chen, Y. Wang, J. Zheng, Y. Zhang, H. Zhou, and D. Li, *ACS Appl. Mater. Interfaces*, 2021, **13**, 26981-26988.
2. B. Shi, Q. Zheng, W. Jiang, L. Yan, X. Wang, H. Lia, Y. Yao, Z. Li, and Z. L. Wang, *Adv. Mater.*, 2016, **28**, 846-852.
3. S. Yu, Y. Zhang, Z. Yu, J. Zheng, Y. Wang, and H. Zhou, *Nano Energy*, 2021, **80**, 105519.
4. G. Suo, Y. Yu, Z. Zhang, S. Wang, P. Zhao, J. Li and X. Wang, *ACS Appl. Mater. Interfaces*, 2016, **8**, 34335-34341.
5. X Li, Z.H Lin, G Cheng, X Wen, Y Liu, S Niu, and ZL Wang, *ACS Nano*, 2014, **8**, 10674–10681.
6. C. Y. Chen, C. Y. Tsai, M. H. Xu, C. T. Wu, C. Y. Huang, T. H. Lee, and Y. K. Fuh, *EXPRESS Polymer Letters*, 2019, **13**, 533–542.

7. T. Huang, C. Wang, H. Yu, H. Wang, Q. Zhang, and M. Zhu, *Nano Energy*, 2015, **14**, 226-235.
8. P. Bai, G. Zhu, Y. S. Zhou, S. Wang, J. Ma, G. Zhang, and Z. L. Wang, *Nano Research*, 2014, **7(7)**, 990-997.
9. Q. Nguyen, B. H. Kim, and J. W. Kwon, *Journal of Microelectromechanical Systems*, 2015, **24(3)**, 519-521.
